# Supplementary material
Source: PubMed Central journal article supplement (PMC4291837)
Supplement: NIHMS61595-supplement-Supplementary_Data.pdf [file NIHMS61595-supplement-Supplementary_Data.pdf]

## SUPPLEMENTARY DATA

### Figure legends

Fig. S1. Effect of the PPTg and/or SNc lesion on latency to respond to the CS and US in the first day of training in the 2-way active avoidance task. Bars represent the mean  $\pm$  SEM latencies to cross to the opposite side of the shuttle box after the CS-US onset averaged in blocks of 10 trials. \*  $P < 0.05$  compared to sham rats in the same block; +  $P < 0.05$  compared to the block 1 in the same group; #  $P < 0.05$  compared to the block 2 in the same group; two-way ANOVA, followed by the Newman-Keuls test.

Fig. S2. Effect of the PPTg and/or SNc lesion on learning of the 2-way active avoidance. The bars represent the mean  $\pm$  SEM number of avoidance, escape, non-response or inter-trial crossings (ITC) averaged in blocks of 10 trials \*  $P < 0.05$  compared to sham in the same day; +  $P < 0.05$  compared to the same group on day 1; two-way ANOVA, followed by the Newman-Keuls test.

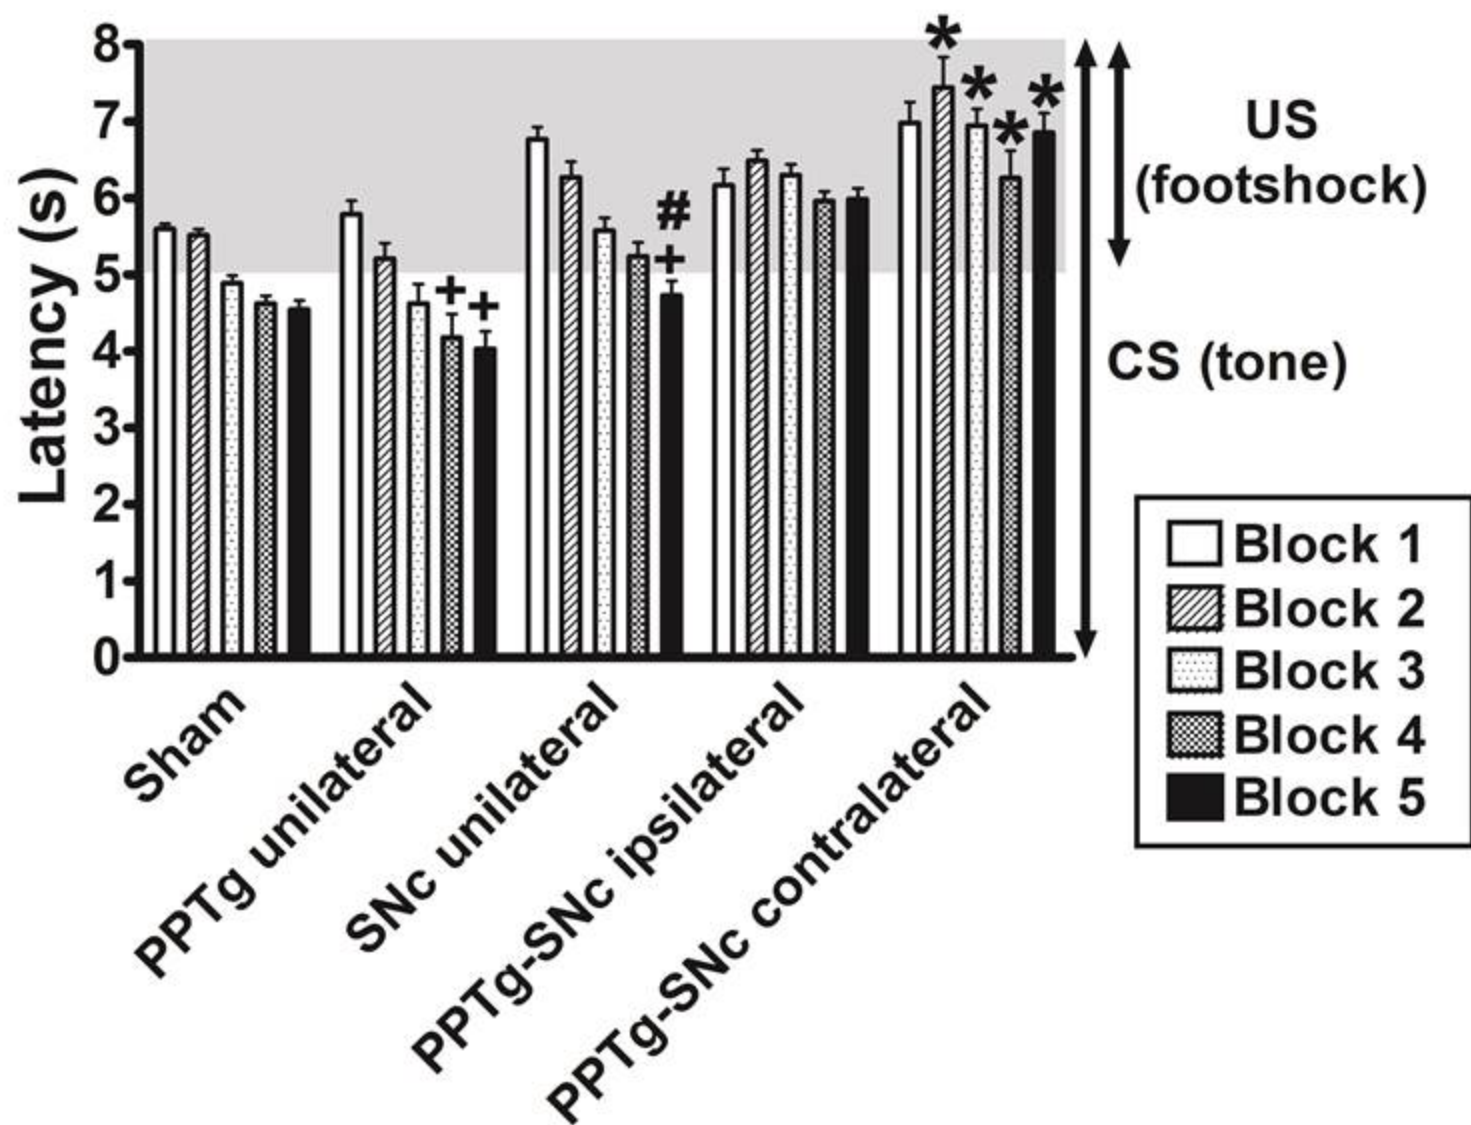

Figure S1

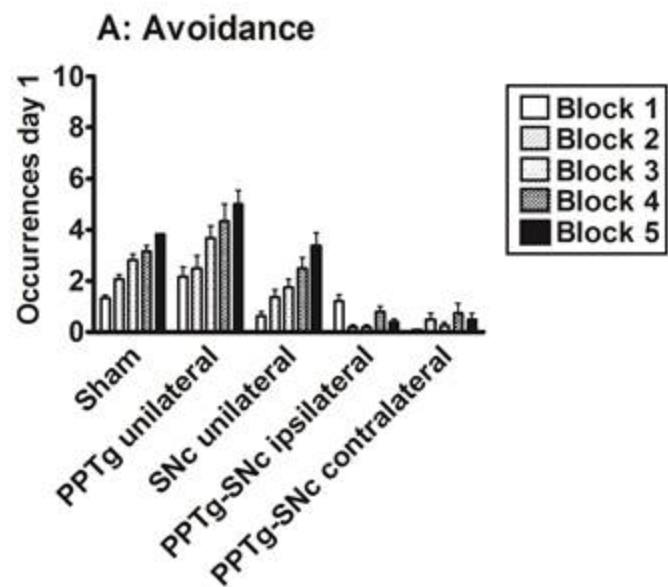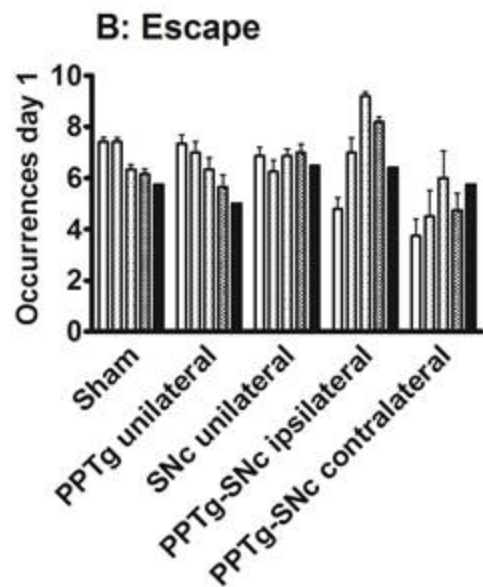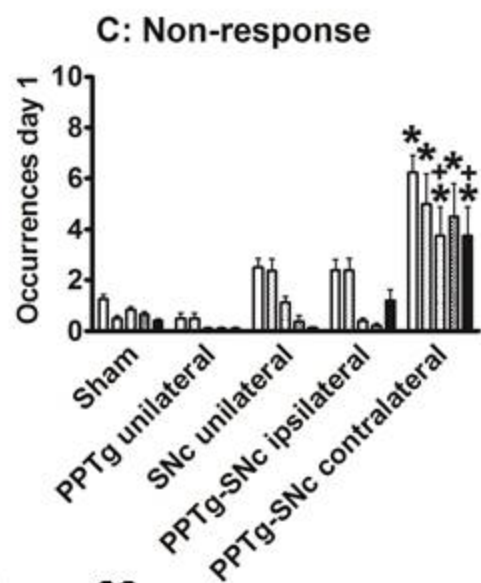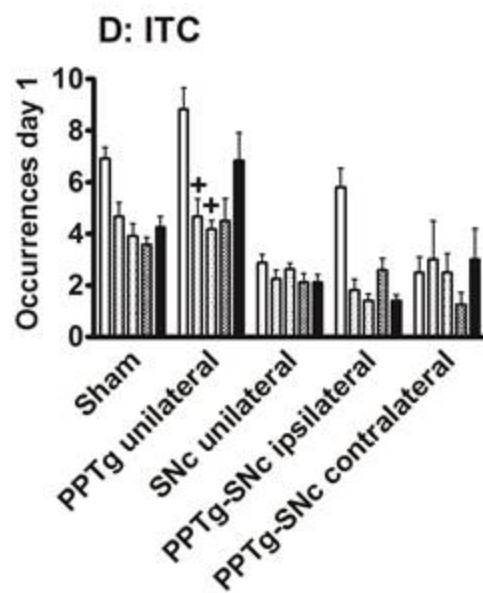

Figure S2

Table S1. Pearson correlation between the number of active avoidances and non-response of rats bearing lesions in the PPTg and/or SNc

|                        | <i>r</i> | <i>p</i> |
|------------------------|----------|----------|
| Sham                   | -0.35    | 0.03     |
| PPTg unilateral        | -0.49    | 0.03     |
| SNc unilateral         | -0.51    | 0.01     |
| PPTg-SNc ipsilateral   | -0.47    | 0.07     |
| PPTg-SNc contralateral | -0.55    | 0.06     |

Table S2. Pearson correlations between the number of active avoidances and intertrial crossings (ITC) of rats bearing lesions in the PPTg and/or SNc

|                        | <i>r</i> | <i>p</i> |
|------------------------|----------|----------|
| Sham                   | - 0.01   | 0.95     |
| PPTg unilateral        | 0.27     | 0.26     |
| SNc unilateral         | - 0.05   | 0.98     |
| PPTg-SNc ipsilateral   | 0.49     | 0.06     |
| PPTg-SNc contralateral | 0.93     | 0.001    |

Table S3. Pearson correlations between the number of active avoidances and escapes of rats bearing lesions in the PPTg and/or SNc

|                        | <i>r</i> | <i>p</i> |
|------------------------|----------|----------|
| Sham                   | -0.79    | 0.001    |
| PPTg unilateral        | -0.99    | 0.001    |
| SNc unilateral         | -0.89    | 0.001    |
| PPTg-SNc ipsilateral   | -0.89    | 0.001    |
| PPTg-SNc contralateral | 0.40     | 0.19     |
